# Supplementary material
Source: PubMed Central journal article supplement (PMC2214679)

## Supplementary data

Supplementary Note 1: Lack of antibodies that specifically recognize AHRR

Quantitation of human AHRR (hAHRR) protein levels in tumors and normal tissue is not shown in this study due to the lack of a working AHRR antibody at the time the experiments were done.

The first reference to an AHRR antibody appeared in 2003 (1). This publication included an immunocytochemistry (IHC) for AHRR on a cryosection of pituitary using an AHRR antibody generated by Dr. Mimura. No characterization of the antibody (including negative controls for the immunocytochemistry as absorption controls or western blots to confirm the size of the immunoreactive band) were shown in this publication. Our group unsuccessfully attempted to characterize this antibody. Even though several publications have focused on AHRR expression and localization (2-7), only two have shown detection of AHRR by ICH (1, 8) and none have shown AHRR protein quantitation (by western blot, RIA or any other assay involving the use of a specific antibody for AHRR) and all report AHRR mRNA measurements instead. Therefore, evidence from previous studies and our own experience supported that an antibody for the analysis (specifically quantification by western blot, RIA, ELISA, etc) of hAHRR protein was not available at the time we performed the experiments included in this manuscript.

A new polyclonal antiAHRR antiserum has recently been reported (9). The antibody was made against the peptide CQFQGKLLKFLFGQKKK. Analysis of this publication and the peptide sequence reveals the following:

1- The authors do not provide data for the characterization of their newly generated antiAHR antibody through western blot followed by absorption controls.

2- the sequence of the peptide used for immunization is located in a region which is highly conserved and shares high homology with other members of the bHLH/PAS family of transcription factors such as the human aryl hydrocarbon receptor (hAHR) as assessed by Blast analysis:

Identities = 12/14 (85%), Positives = 13/14 (92%), Gaps = 0/14 (0%)

```
Peptide used for immunization 3 FQGKLFKFLFGQKKK 16
                                FQGKLK+L GQKKK
hAHR                          239 FQGKLYLHGQKKK 252
```

**Sequence 1:** hAHR Locus [NP\\_001612](#) Length = 848 (1 .. 848)

**Sequence 2:** hAHR Locus [NP\\_065782](#) Length = 719 (1 .. 719)

Score = 273 bits (699), Expect = 5e-71

Identities = 186/413 (45%), Positives = 238/413 (57%), Gaps = 51/413 (12%)

```
Query 9 TYASRKRKRPVQKTVKPIPAEGIKSNPSKRHRDRNLNTELDRLASLLPFPQDVINKLKDCLS 68
        TYA RKRR+P+QK + AE KSNPSKRHRDRNLN ELD LASLLPFP D+I+KLDKLS
Sbjct 12 TYAGRKRKRPLQKQRPVAVGAE--KSNPSKRHRDRNLNAELDHLASLLPFPDDIISKLDKLS 69

Query 69 VLRLSVSYLRKASFFDVALKSSPTERNGGQ----DNCRAANFREGLNLQEGEFLLQALNG 124
        VLRLSVSYLR KSFF V + S + G D+C A G + EG LL++LNG
Sbjct 70 VLRLSVSYLRVKSFFQVVQEQSSRQPAAGAPSPGDSCPLA----GSAVLEGRLLLESING 125

Query 125 FVLVVTTDALVFYASSTIQDYLGFQSDVIHQSVYELIHTEDRAEFQRQLHWALNPSQCT 184
        F LVV+ + +FYAS+TI DYLG F Q+DV+HQ++Y+ IH +DR +F RQLHWA++P Q
Sbjct 126 FALVVS AEGTIF YASATIVDYLGFHQTDVMHQNIYDYIHVDDRQDFCRQLHWAMDPQVV 185

Query 185 ESGQGIEEATGLPQTVVCYNPDQ-----IPPENSPLMERCFCICRLRCLLDNSSGFLA--- 236
        GQ TG + Q P E S + RCFICR+RCLLD++SGFLA
Sbjct 186 -FGQPPPLETGDDAILGRLLRAQEWGTGTPTEYS AFLTRCFICRVRCLLDSTSGFLARGS 244

Query 237 -----MNFQGKLYLHGQKKKGKDGSI LPPQLALFAIATPLQPPSILEIR 281
        M FQGKLK+L GQKKK G++LPP+L+LF IA P+ PS E++
Sbjct 245 QAWQLRLCCPEPLMTMQFQGKLFKFLFGQKKKAPSGAMLPPRLSLFCIAAPVLLPSAAEMK 304

Query 282 TKNFIFRTHKHLDFTPIGCDAGRIVLGYTEAELCTRGSGYQFIHAADMLYCAESHIRMI 341
        ++ + R K + D T DAK + E+EL + + Y A R
Sbjct 305 MRSALLRAKPRAD-TAATADAKV KATTSLCESELHGKPN-----YSAGRSSR-- 350

Query 342 KTGESGMIVFRLLTKNNRWTWVQSNARLLYKNGRPDYIIVTQRPLTDEEGTEH 394
        ESG++V R T RW V + A L G PD ++ + D E +H
Sbjct 351 ---ESGVLVLRQTDAGRWAQV PARAPCLCLRGGPDLVLDPKGGSGDREEEQH 400
```

It seems logical to consider the possibility that this polyclonal antibody would recognize several epitopes in this peptide some of which could be found in AHR. Therefore, we feel that full characterization of this antibody is needed.

Supplementary Table 1: Primer sets covering exons 2-11 of the *AHRR* gene used in the mutational analysis.

| Primer name | Sequence                    | Primer size |
|-------------|-----------------------------|-------------|
| Ex2F        | 5'-ccaaccctccccttccat-3'    | 18 bp       |
| Ex2R        | 5'-gtgcccccttgcttccag-3'    | 19 bp       |
| Ex3F        | 5'-aagtgaacaggtgggagcag-3'  | 20 bp       |
| Ex3R        | 5'-cacctgaccagaccatctc-3'   | 20 bp       |
| Ex4F        | 5'-cggagaaccaagtgtcaagtg-3' | 21 bp       |
| Ex4R        | 5'-gggggtgctaatgtgtctt-3'   | 20 bp       |
| Ex5F        | 5'-tggaggctattctggttc-3'    | 20 bp       |
| Ex5R        | 5'-catttgggtgagccaattc-3'   | 20 bp       |
| Ex6F        | 5'-gactcacttgaccccagac-3'   | 20bp        |
| Ex6R        | 5'-cacttgggtaaggctgaaa-3'   | 20bp        |
| Ex7F        | 5'-agggaccacgcactcac-3'     | 18 bp       |
| Ex7R        | 5'-ccttggccctatgtct-3'      | 18 bp       |
| Ex8F        | 5'-acagggctggaattcgta-3'    | 19 bp       |
| Ex8R        | 5'-ggggatggttcaggatgat-3'   | 20 bp       |
| Ex9F        | 5'-gcaccatgtggctgtgaa-3'    | 18 bp       |
| Ex9R        | 5'-accagacgatgcagttcaa-3'   | 20 bp       |
| Ex10F       | 5'-cccatgtgaaaagatcaga-3'   | 20 bp       |
| Ex10R       | 5'-tgtcatctgttcatccgtca-3'  | 21 bp       |
| Ex11F       | 5'-gctgcctggcaccacttac-3'   | 19 bp       |
| Ex11R       | 5'-cccctctaaacccaac-3'      | 18 bp       |

Supplementary Table 2: Summary of SSCP and sequencing analysis of AHRR gene in cervical cancer (n = 30)

| Exon/Tumor | SSCP Variant in tumor | Nucleotide in normal DNA | Nucleotide change in tumor | cDNA position | Comments                                                                                                                               |
|------------|-----------------------|--------------------------|----------------------------|---------------|----------------------------------------------------------------------------------------------------------------------------------------|
| Ex11/T-82  | +                     | T/G                      | T prominent<br>G residual  | 1216 bp       | T/G at 1216 is a known polymorphism; residual G peak in tumor indicates LOH of the allele containing G                                 |
| Ex11/T-93  | +                     | T/G                      | G prominent<br>T residual  | 1216 bp       | T/G at 1216 is a known polymorphism; residual T peak in tumor indicates LOH of the allele containing T                                 |
| Ex4/T-104  | +                     | G/A                      | G/A                        | 385 bp        | This is a polymorphism since it was present in both tumor and normal DNA. (An intronic polymorphism was also seen but not stated here) |
| Ex6/T-117  | +                     | G/C                      | G                          | 609 bp        | Only G peak is present in Tumor; consistent with LOH of allele containing C; Known polymorphism                                        |
| Ex6/CaSki  | +                     | Not known                | T→G                        | 565 bp        | This is polymorphism or not can not be ruled out as this is a cell line                                                                |
| Ex6/C-33A  | +                     | Not known                | T/C                        | 508 bp        | This is polymorphism or not                                                                                                            |

|  |  |  |  |  |                                               |
|--|--|--|--|--|-----------------------------------------------|
|  |  |  |  |  | can not be rule out as this is<br>a cell line |
|--|--|--|--|--|-----------------------------------------------|

In addition to the data shown in this table, sequencing of the AHRR expression plasmids confirmed some of the variants already described

([http://www.ensembl.org/Homo\\_sapiens/protview?db=core;peptide=ENSP00000323816](http://www.ensembl.org/Homo_sapiens/protview?db=core;peptide=ENSP00000323816))

. No conclusive data showing association of mutations or polymorphisms of *AHRR* to cancer were generated in this study. Although an association has been shown between *AHRR* polymorphism and male infertility (10, 11), micropenis (12), and advanced stage endometriosis (13), no relationship has been found with endometriosis (2) or lung cancer (14). The data presented in the this study together with the current literature do not support that mutations or polymorphisms are relevant in the biology of AHRR as it relates to carcinogenesis.

Supplementary Table 3: Reactivation of *AHRR* mRNA expression after treatment with demethylating agent.

| Cancer type | <i>AHRR</i> mRNA reactivation* |         |      |     |
|-------------|--------------------------------|---------|------|-----|
|             | 0-1.4                          | 1.5-2.9 | 3-10 | >10 |
| Cervix      | 3                              | 3       | 2    | 1   |
| Lung        |                                |         | 2    | 1   |
| Testis      | 1                              |         |      | 1   |

\* Samples were treated with 5-Aza-2' deoxycytidine, TSA or a combination of both.

Results are expressed as fold increase of *AHRR* mRNA levels of cells unexposed versus exposed with the treatment that showed higher differences.

Supplementary Table 3: Transcription factor binding sites in the -333 to +27 bp of the promoter region of the *AHRR* gene

| Transcription factor                                  | OMS  | MS    | Position<br>From/To | Str | Sequence                         |
|-------------------------------------------------------|------|-------|---------------------|-----|----------------------------------|
| Winged helix protein, involved in hair keratinization |      |       |                     |     |                                  |
| and thymus epithelium differentiation                 | 0.95 | 0.956 | -333/-23            | (+) | agg <b>ACGC</b> cggt             |
| Zinc finger transcription factor ZBP-89               | 0.93 | 0.951 | -269/-247           | (-) | gtccccgcct <b>CCCC</b> cagagaagc |
| Myeloid zinc finger protein MZF1                      | 0.98 | 0.985 | -233/-227           | (+) | ga <b>GGG</b> Ga                 |
| c-Ets-1 binding site                                  | 0.92 | 0.92  | -142/-126           | (+) | ggagc <b>AGG</b> Aggtggggg       |
| Basic krueppel-like factor (KLF3)                     | 0.95 | 0.956 | -113/-101           | (+) | gc <b>GGG</b> Tgtggggg           |
| Wilms Tumor Suppressor                                | 0.88 | 0.965 | -111/-97            | (+) | gggtg <b>TGG</b> Gggcgcc         |
| Zinc finger / POZ domain transcription factor         | 0.95 | 0.956 | -105/-95            | (+) | gggg <b>GCG</b> Ccag             |
| Upstream stimulating factor                           | 0.86 | 0.986 |                     | (-) | gcgc <b>CACG</b> tgcgcc          |
| Hypoxia induced factor-1 (HIF-1)                      | 0.87 | 0.976 |                     | (+) | gggcgc <b>ACG</b> Tggcgc         |
| Hypoxia inducible factor, bHLH / PAS protein family   | 0.93 | 0.967 |                     | (+) | gggcgca <b>CGT</b> Ggcgc         |
| AHR nuclear translocator homodimers                   | 0.89 | 0.965 |                     | (+) | gggcgca <b>CGT</b> Ggcgc         |
| Upstream stimulating factor                           | 0.92 | 0.936 |                     | (-) | gcgc <b>CACG</b> tgcgcc          |
| MYC-MAX binding sites                                 | 0.92 | 0.982 |                     | (-) | gcgc <b>CACG</b> tgcgcc          |
| Max                                                   | 0.85 | 0.936 |                     | (-) | gcgc <b>CACG</b> tgcgcc          |
| Upstream stimulating factor                           | 0.91 | 0.985 |                     | (-) | gcgcca <b>CGT</b> Gcgccc         |
| N-Myc                                                 | 0.91 | 0.979 | -56/-42             | (-) | gcgcca <b>CGT</b> Gcgccc         |
| Upstream stimulating factor                           | 0.86 | 0.986 | -55/-41             | (+) | ggcg <b>CACG</b> tggcgcg         |
| Upstream stimulating factor                           | 0.92 | 0.937 |                     | (+) | ggcg <b>CACG</b> tggcgcg         |
| Max                                                   | 0.85 | 0.936 |                     | (+) | ggcg <b>CACG</b> tggcgcg         |
| c-Myc/Max heterodimer                                 | 0.92 | 0.929 |                     | (+) | ggcg <b>CACG</b> tggcgcg         |
| Upstream stimulating factor                           | 0.91 | 0.955 |                     | (+) | ggcgca <b>CGT</b> Gcgcg          |
| N-Myc                                                 | 0.91 | 0.978 |                     | (+) | ggcgca <b>CGT</b> Gcgcg          |



|                                                     |      |       |         |     |                           |
|-----------------------------------------------------|------|-------|---------|-----|---------------------------|
| Hypoxia inducible factor, bHLH / PAS protein family | 0.93 | 0.934 |         | (-) | cgcgcc <b>CGTG</b> cgcc   |
| AHR nuclear translocator homodimers                 | 0.89 | 0.943 |         | (-) | cgcgcc <b>CGTG</b> cgcc   |
| Elk-1                                               | 0.92 | 0.942 | -47/-31 | (-) | gtcacc <b>GGAA</b> cgccca |
| Activator protein 2                                 | 0.89 | 0.907 | +5/+17  | (+) | at <b>CCCG</b> ccggggg    |

MS: Matrix similarity; OMS: Optimized MS

### Supplementary Figure 1

Evaluation of non-silencing controls. A: Comparison of *AHRR* mRNA levels in A549E, A549sr and A549wt. As expected no statistically significant differences were observed. B: Evaluation of the growth potential of A549E (squares), A549sr (diamonds) and A549wt (circles) over time. As expected from their similar *AHRR* levels no differences in the growth rate was observed. C: Comparison of the migratory potential of A549E, A549sr and A549wt. No differences in the migratory potential of the three cells lines were observed. Collectively these data supporting that the three cells lines exhibit similar phenotypes validating them for their use as non-silencing controls.

### Supplementary Figure 2

Identification of promoter hypermethylation in cervical and ovarian carcinomas, and testicular germ cell tumors by methylation-specific PCR. U, unmethylated allele; M, methylated allele; C-33A, HT-3, SiHa, ME-180, HeLa, and T-16 represent cervical cancer; OVACAR29, A224, CP20, and OVT2 are ovarian cancer; T-178A, T-480A, T-407A, and T-395 are testicular germ cell tumors. All samples were run in the same gel although were noncontiguous.

### Supplementary Figure 3

Real time PCR measurements of *AHRR* mRNA levels in bronchioloalveolar carcinoma A549 (a) and normal breast MCF10A (b) transfectants (experiments were run in triplicate). Cells transfected with siRNA for *AHRR* (A549F/G and MCF10A-F/G)

showed significant reduction in *AHRR* mRNA when compared with empty vector transfected cells (A549E and MCF10A-E). Notice that the effect of the siRNA seems to be more prominent in A549 than in MCF10A. \*, P<0.05; \*\*, P<0.01; \*\*\*, P<0.001

## References

1. Huang, P., Ceccatelli, S., Hoegberg, P., Sten Shi, T.J., Hakansson, H., and Rannug, A. 2003. TCDD-induced expression of Ah receptor responsive genes in the pituitary and brain of cellular retinol-binding protein (CRBP-I) knockout mice. *Toxicol Appl Pharmacol* 192:262-274.
2. Baba, T., Mimura, J., Gradin, K., Kuroiwa, A., Watanabe, T., Matsuda, Y., Inazawa, J., Sogawa, K., and Fujii-Kuriyama, Y. 2001. Structure and expression of the Ah receptor repressor gene. *J Biol Chem* 276:33101-33110.
3. Bernshausen, T., Jux, B., Esser, C., Abel, J., and Fritsche, E. 2006. Tissue distribution and function of the Aryl hydrocarbon receptor repressor (AhRR) in C57BL/6 and Aryl hydrocarbon receptor deficient mice. *Arch Toxicol* 80:206-211.
4. Evans, B.R., Karchner, S.I., Franks, D.G., and Hahn, M.E. 2005. Duplicate aryl hydrocarbon receptor repressor genes (*ahrr1* and *ahrr2*) in the zebrafish *Danio rerio*: structure, function, evolution, and AHR-dependent regulation in vivo. *Arch Biochem Biophys* 441:151-167.
5. Kanno, Y., Takane, Y., Izawa, T., Nakahama, T., and Inouye, Y. 2006. The Inhibitory Effect of Aryl Hydrocarbon Receptor Repressor (AhRR) on the Growth of Human Breast Cancer MCF-7 Cells. *Biol Pharm Bull* 29:1254-1257.
6. Brauze, D., Widerak, M., Cwykiel, J., Szyfter, K., and Baer-Dubowska, W. 2006. The effect of aryl hydrocarbon receptor ligands on the expression of AhR, AhRR, ARNT, Hif1alpha, CYP1A1 and NQO1 genes in rat liver. *Toxicol Lett* 167:212-220.
7. Yamamoto, J., Ihara, K., Nakayama, H., Hikino, S., Satoh, K., Kubo, N., Iida, T., Fujii, Y., and Hara, T. 2004. Characteristic expression of aryl hydrocarbon receptor repressor gene in human tissues: organ-specific distribution and variable induction patterns in mononuclear cells. *Life Sci* 74:1039-1049.
8. Fetissov, S.O., Huang, P., Zhang, Q., Mimura, J., Fujii-Kuriyama, Y., Rannug, A., Hokfelt, T., and Ceccatelli, S. 2004. Expression of hypothalamic neuropeptides after acute TCDD treatment and distribution of Ah receptor repressor. *Regul Pept* 119:113-124.
9. Haarmann-Stemmann, T., Bothe, H., Kohli, A., Sydlik, U., Abel, J., and Fritsche, E. 2007. Analysis of the transcriptional regulation and molecular function of the Aryl Hydrocarbon Receptor Repressor in human cell lines. *Drug Metab Dispos.*

10. Watanabe, M., Sueoka, K., Sasagawa, I., Nakabayashi, A., Yoshimura, Y., and Ogata, T. 2004. Association of male infertility with Pro185Ala polymorphism in the aryl hydrocarbon receptor repressor gene: implication for the susceptibility to dioxins. *Fertil Steril* 82 Suppl 3:1067-1071.
11. Merisalu, A., Punab, M., Altmae, S., Haller, K., Tiido, T., Peters, M., and Salumets, A. 2007. The contribution of genetic variations of aryl hydrocarbon receptor pathway genes to male factor infertility. *Fertil Steril* 88:854-859.
12. Soneda, S., Fukami, M., Fujimoto, M., Hasegawa, T., Koitabashi, Y., and Ogata, T. 2005. Association of micropenis with Pro185Ala polymorphism of the gene for aryl hydrocarbon receptor repressor involved in dioxin signaling. *Endocr J* 52:83-88.
13. Kim, S.H., Choi, Y.M., Lee, G.H., Hong, M.A., Lee, K.S., Lee, B.S., Kim, J.G., and Moon, S.Y. 2007. Association between susceptibility to advanced stage endometriosis and the genetic polymorphisms of aryl hydrocarbon receptor repressor and glutathione-S-transferase T1 genes. *Hum Reprod* 22:1866-1870.
14. Cauchi, S., Stucker, I., Cenee, S., Kremers, P., Beaune, P., and Massaad-Massade, L. 2003. Structure and polymorphisms of human aryl hydrocarbon receptor repressor (AhRR) gene in a French population: relationship with CYP1A1 inducibility and lung cancer. *Pharmacogenetics* 13:339-347.

**A**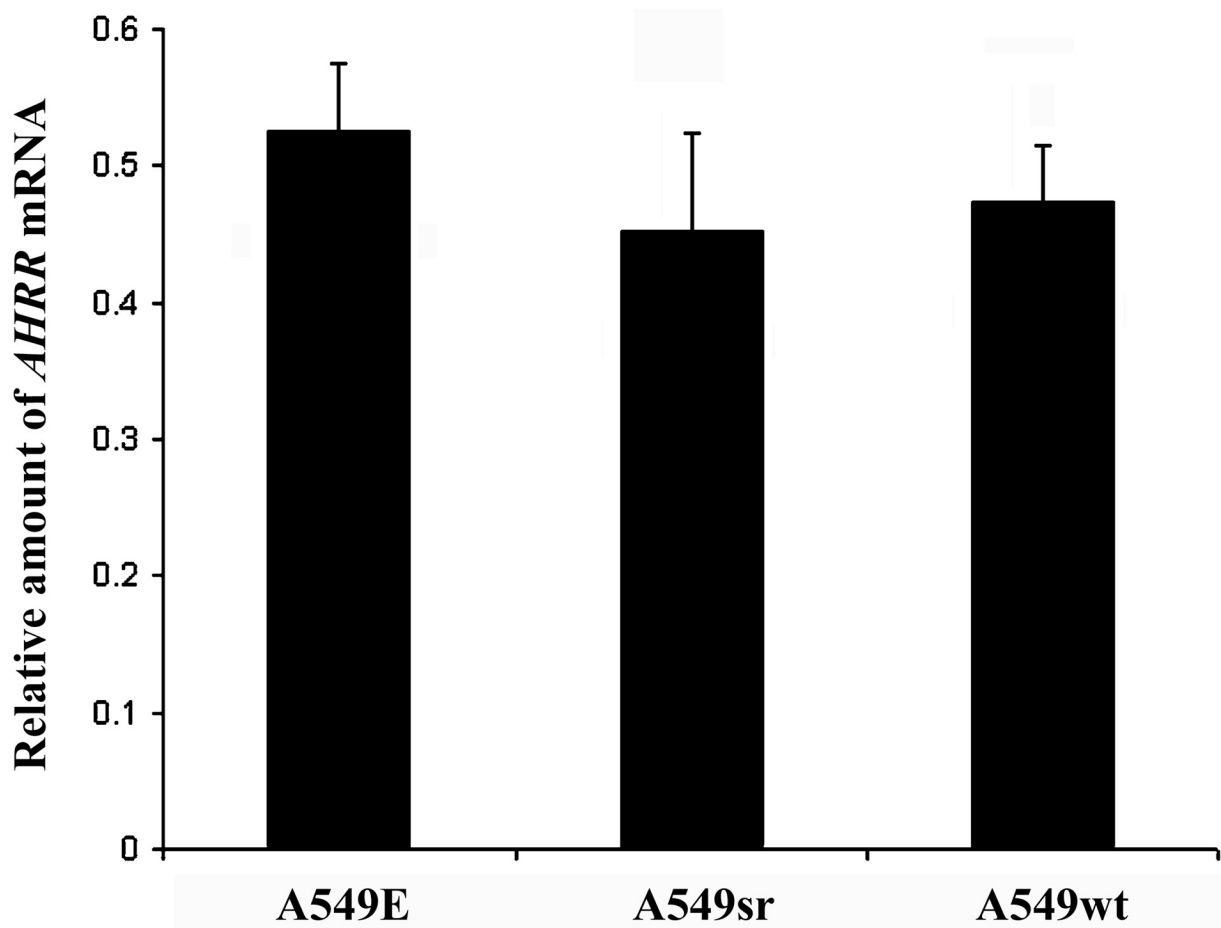**B**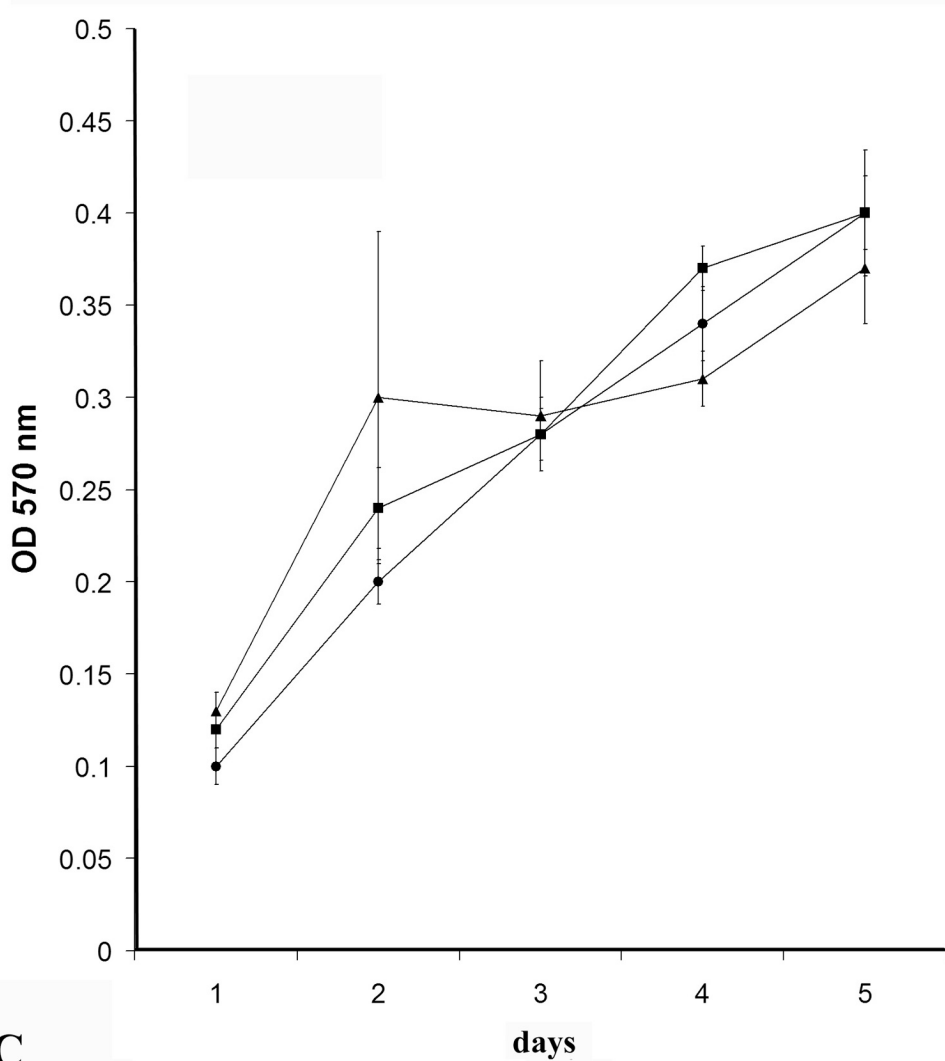**C**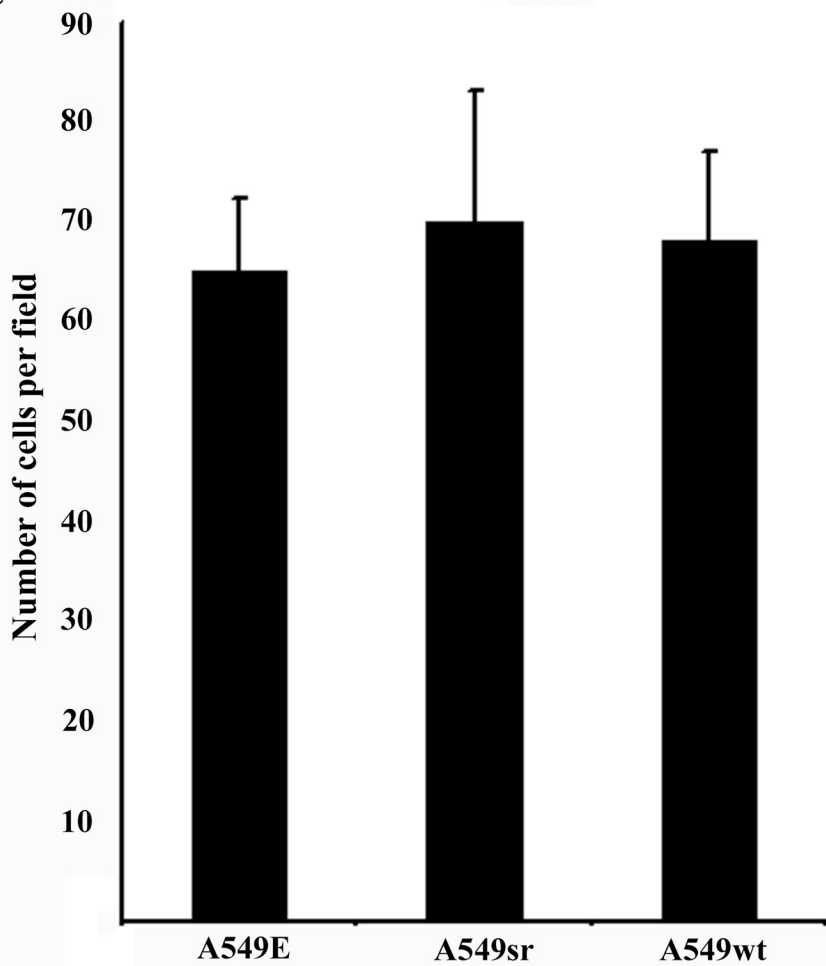

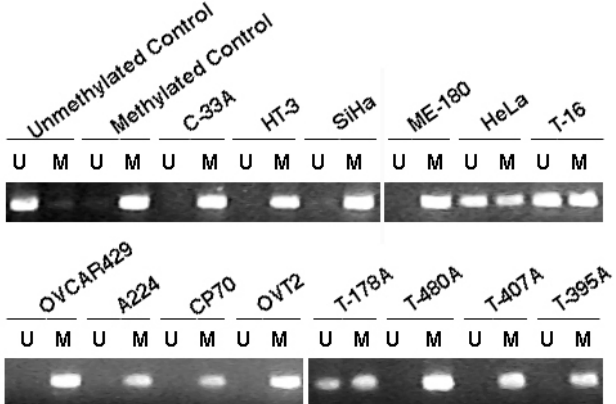

**A**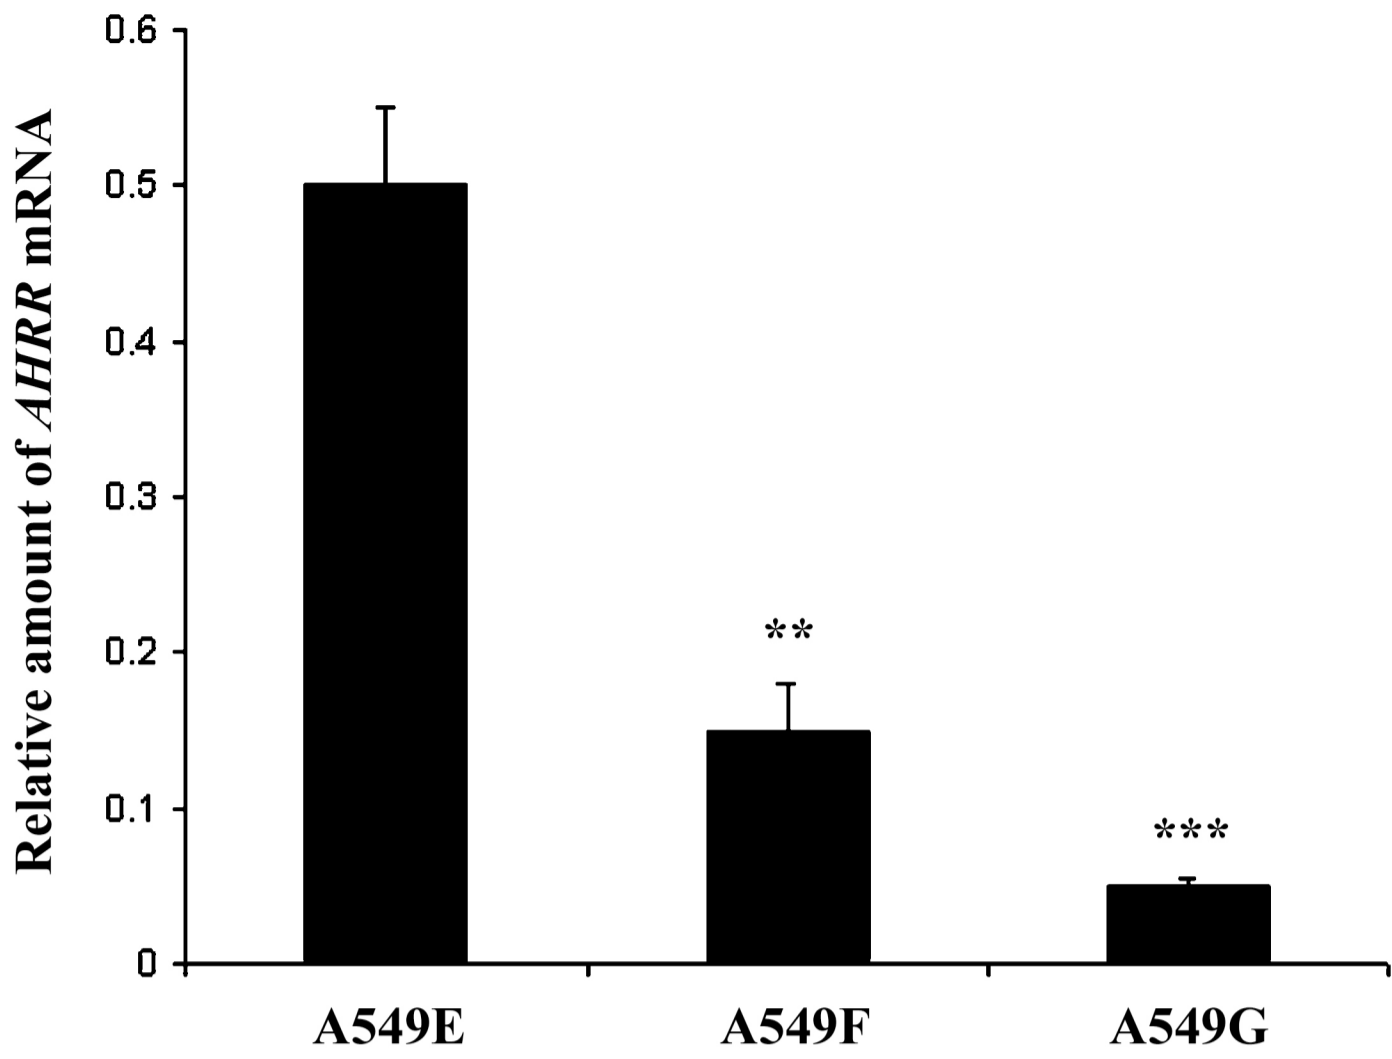**B**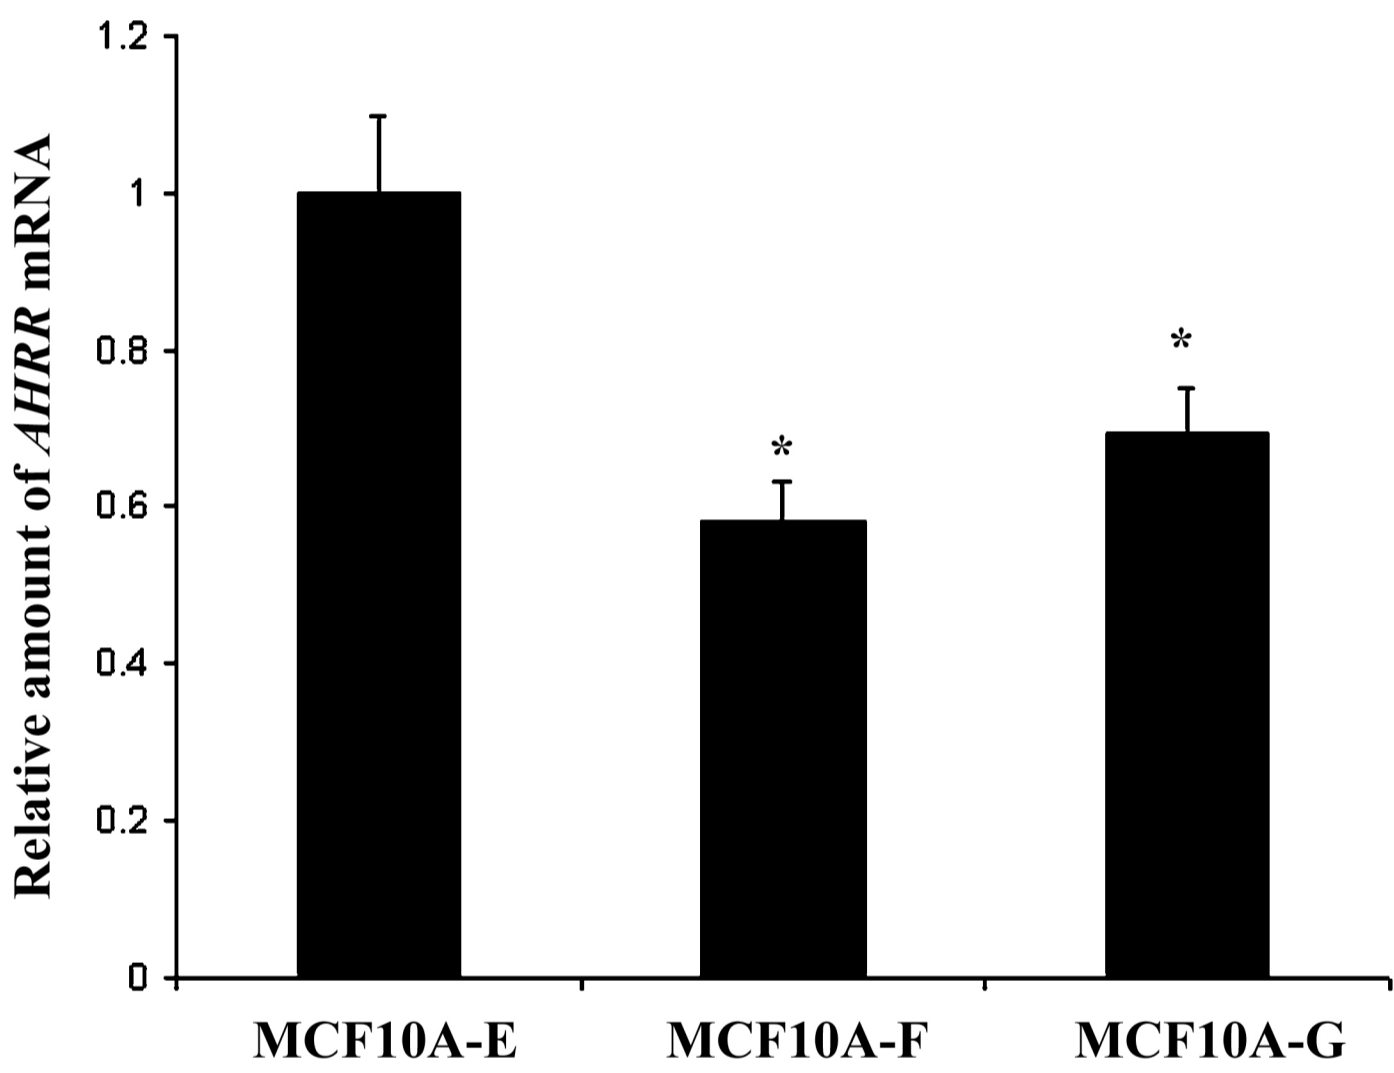**C**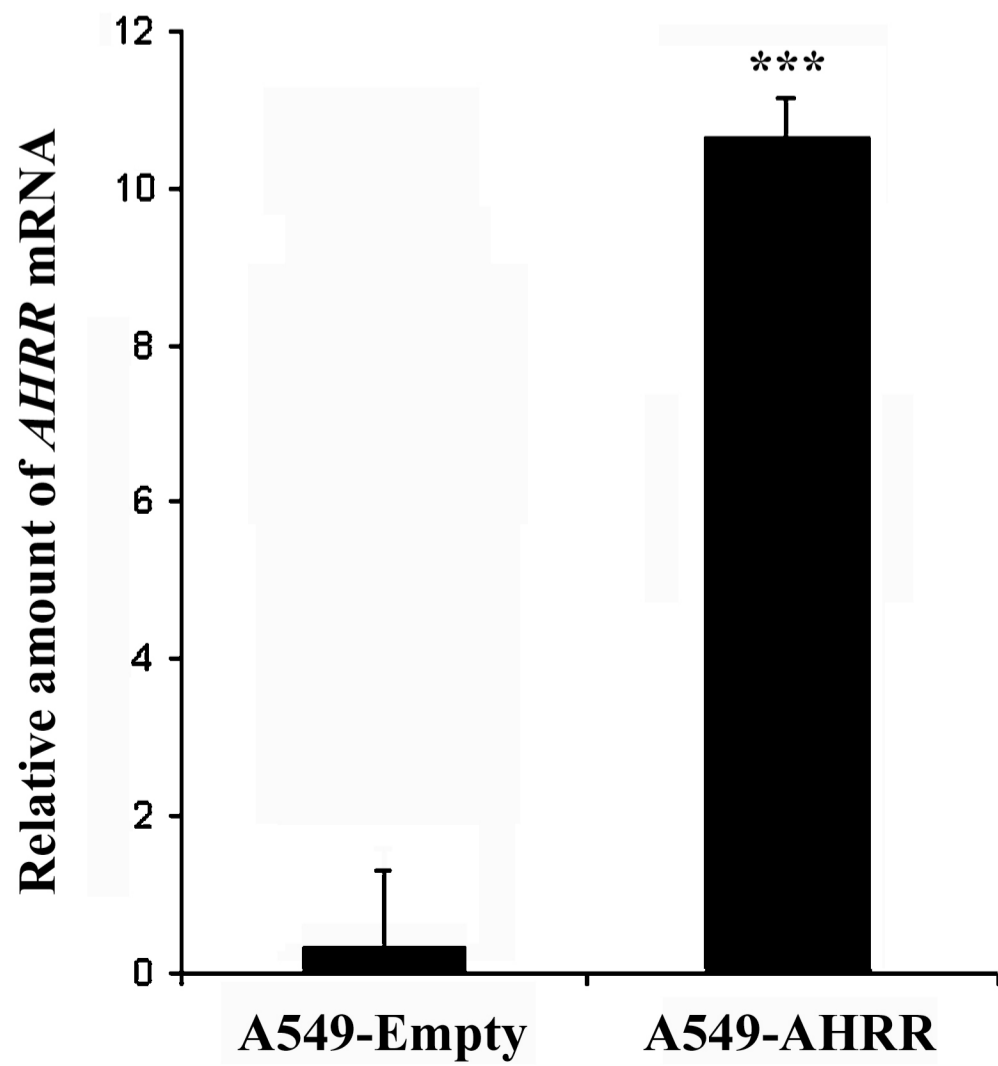

Supplement: JCI0830024sd.pdf [file JCI0830024sd.pdf]
